# Supplementary material for: Recombinant Lactococcus lactis Expressing Haemagglutinin from a Polish Avian H5N1 Isolate and Its Immunological Effect in Preliminary Animal Trials
Source: Biomed Res Int. 2017 Feb 22;2017:6747482. doi: 10.1155/2017/6747482 (PMC5340954; doi:10.1155/2017/6747482)
Supplement: Supplementary file 1 — Supplementary Figure 1. Specific serum antibody response in mice ingested with L. lactis NZ-H5 cells. Days on which mice (n = 10) were immunized with 109 CFU of bacteria are indicated by arrows. H5-specific IgG (A) and IgA (B) titers were measured in serum samples collected on days 9, 17, 25 and 41 at 1:25 dilution. Graphs show results obtained for each immunized mice at given time point of blood sampling (diamonds). Data was normalized by adapting the cut-off (point 0 on the axis) as mean OD readings higher by 2 SD than for control mice. Supplementary Figure 2. Specific serum antibody response in mice ingested with L. lactis L-H5 cell lysates. Days on which mice (n = 10) were immunized with 109 CFU of bacteria are indicated by arrows. H5-specific IgG (A) and IgA (B) titers were measured in serum samples collected on days 9, 17, 25 and 41 at 1:25 dilution. Graphs show results obtained for each immunized mice at given time point of blood sampling (diamonds). Data was normalized by adapting the cut-off (point 0 on the axis) as mean OD readings higher by 2 SD than for control mice. [file 6747482.f1.xls]

## Sheet: Arkusz1
Supplementary Figure 1
