# Supplementary material for: Recombinant Lactococcus lactis Expressing Haemagglutinin from a Polish Avian H5N1 Isolate and Its Immunological Effect in Preliminary Animal Trials
Source: Biomed Res Int. 2017 Feb 22;2017:6747482. doi: 10.1155/2017/6747482 (PMC5340954; doi:10.1155/2017/6747482)
Supplement: Supplementary file 2 [file 6747482.f2.xls]

## Sheet: Arkusz1
Supplementary Figure 2
